7. Shibata S, Briggs AH: Mechanical activity of vascular smooth muscle under anoxia. *Amer J Physiol* 212:981, 1967
8. Ross JE, Fairchild HM, Weldy O, *et al.*: Autoregulation of blood flow by oxygen lack. *Amer J Physiol* 202:21, 1962
9. Kahler RL, Goldblatt A, Braunwald E: Effects of acute hypoxia on systemic venous and arterial systems and on myocardial contractile force. *J Clin Invest* 41:1553, 1962
10. Nejad NS, Ogden E: Effect of hypoxia on the myocardium in heartlung preparation. *Proc Soc Exp Biol Med* 126:767, 1967
11. Ng ML, Levy MN, DeGeest H, *et al.*: Effects of myocardial hypoxia on left ventricular performance. *Amer J Physiol* 211:43, 1966
12. Noble MIM, Trenchard D, Cuz A: Effect of changes in  $P_{aCO_2}$  and  $P_{aO_2}$  on cardiac performance in conscious dogs. *J Appl Physiol* 22:147, 1967
13. Biscoe TJ, Purves MJ: Observations on carotid body chemoreceptor activity and cervical sympathetic discharge in the cat. *J Physiol (London)* 190:413, 1967
14. Chalmers JP, Isbister JP, Korner PI, *et al.*: Role of sympathetic nervous system response of rabbit to arterial hypoxia. *J Physiol (London)* 181:175, 1965
15. Daly MD, Scott MJ: Cardiovascular response to stimulation of the carotid body chemoreceptor in dogs. *J Physiol (London)* 165: 179, 1963
16. Neil E.: Peripheral receptors concerned in the response to hypoxia, International Symposium on Cardiovascular and Respiratory Effects of Hypoxia, Kingston, Ontario. New York, Hafner, 1966, p 110
17. Penna M, Soma L, Aviado DM: Role of carotid and aortic bodies in mediating the increase in cardiac output during anesthesia. *Amer J Physiol* 203:133, 1962
18. Cross BA, Silver IA: Central activation of sympathoadrenal system by hypoxia and hypercapnia. *J Endocr* 24:91, 1962
19. Richardson DW, Kontos HA, Roper AJ, *et al.*: Modification by  $\beta$ -adrenergic blockade of circulatory responses to acute hypoxia in man. *J Clin Invest* 46:77, 1967
20. Goldfien A, Ganong WF: Qualitative effects of various stimuli on adrenal medullary secretion. *Fed Proc* 18:211, 1959
21. Hatcher JD, Jennings DB: Mechanisms regulating cardiovascular response to hypoxia, International Symposium on Cardiovascular and Respiratory Effects of Hypoxia, Kingston, Ontario. New York, Hafner, 1966
22. Price HL, Price ML: Has halothane a predominant circulatory action? *ANESTHESIOLOGY* 27: 55, 1966
23. Black GV, McArdle L: The effects of halothane on the peripheral circulation in man. *Brit J Anaesth* 34:2, 1962
24. Biscoe TJ, Millar RA: Effects of inhalation anesthetics on carotid body chemoreceptor activity. *Brit J Anaesth* 40:2, 1968
25. Millar RA, Warden JC, Cooperman LH, *et al.*: Central sympathetic discharge and mean arterial pressure during halothane anesthesia. *Brit J Anaesth* 41:918, 1969
26. Price HL, Linde HW, Jones RE, *et al.*: Sympathoadrenal responses to general anesthesia in man and their relation to hemodynamics. *ANESTHESIOLOGY* 20:563, 1959
27. Downing SE: Autonomic influences on cardiac function in systemic hypoxia, International Symposium on the Cardiovascular and Respiratory Effects of Hypoxia, Kingston, Ontario. New York, Hafner, 1966, p 208
28. Mitchell RA, Bainton CR, Severinghaus JW, *et al.*: Respiratory response and CSF pH during disturbances in blood acid-base balance in awake dogs with denervated aortic and carotid bodies. *Physiologist* 7:208, 1964
29. Dell PC: In Henry Ford Hospital International Symposium, "The Reticular Formation of the Brain." Boston, Little, Brown and Co., 1957, p 372
30. Duke P, Wade JG, Hickey R, *et al.*: The effect of age on baroreceptor function in man. Presented at the American Society of Anesthesiologists Scientific Session, San Francisco, 1969

### Anesthesia

**ASPIRATION PNEUMONIA** A pregnant woman aspirated highly acid gastric contents during anesthesia for a cervical circlage procedure after she had received alcohol intravenously to stop premature labor. Pulmonary lavage extended and intensified the pneumonitis. She required several days of intensive pulmonary therapy with intermittent positive-pressure ventilation monitored by frequent blood-gas determinations, in addition to treatment with steroids and antibiotics. Alcohol is a potent gastric acid secretagogue. Patients in premature labor treated with alcohol intravenously must be considered to have stomach contents. (Greenhouse, B. S., and others: *Aspiration Pneumonia following Intravenous Administration of Alcohol during Labor*, J.A.M.A. 210: 2393 (Dec.) 1969.)
